# Supplementary material for: Plasma nitrogen fixation in the presence of a liquid interface: role of OH radicals
Source: Royal Society of Chemistry journal article supplement (doi:10.1039/d2re00014h), 2022-01-01
Supplement: d2re00014h1.pdf [file d2re00014h1.pdf]

## Plasma nitrogen fixation in the presence of a liquid interface

Mikhail Gromov<sup>1,2,a)</sup>, Kseniia Leonova<sup>1</sup>, Nikolay Britun<sup>3</sup>, Nathalie De Geyter<sup>2</sup>, Rino Morent<sup>2</sup>, Rony Snyders<sup>1,4</sup>, and Anton Nikiforov<sup>2</sup>.

<sup>1</sup> Chimie des Interactions Plasma-Surface (ChIPS), CIRMAP, Mons University, 7000-Mons, Belgium

<sup>2</sup> Research Unit Plasma Technology (RUPT), Department of Applied Physics, Ghent University, 9000-Gent, Belgium

<sup>3</sup> Center for Low-temperature Plasma Sciences, Nagoya University, Chikusa-ku, Nagoya, 464-8603 Japan

<sup>4</sup> Materia Nova Research Centre, Parc Initialis, 7000-Mons, Belgium

a) Author to whom correspondence should be addressed: mikhail.gromov@ugent.be

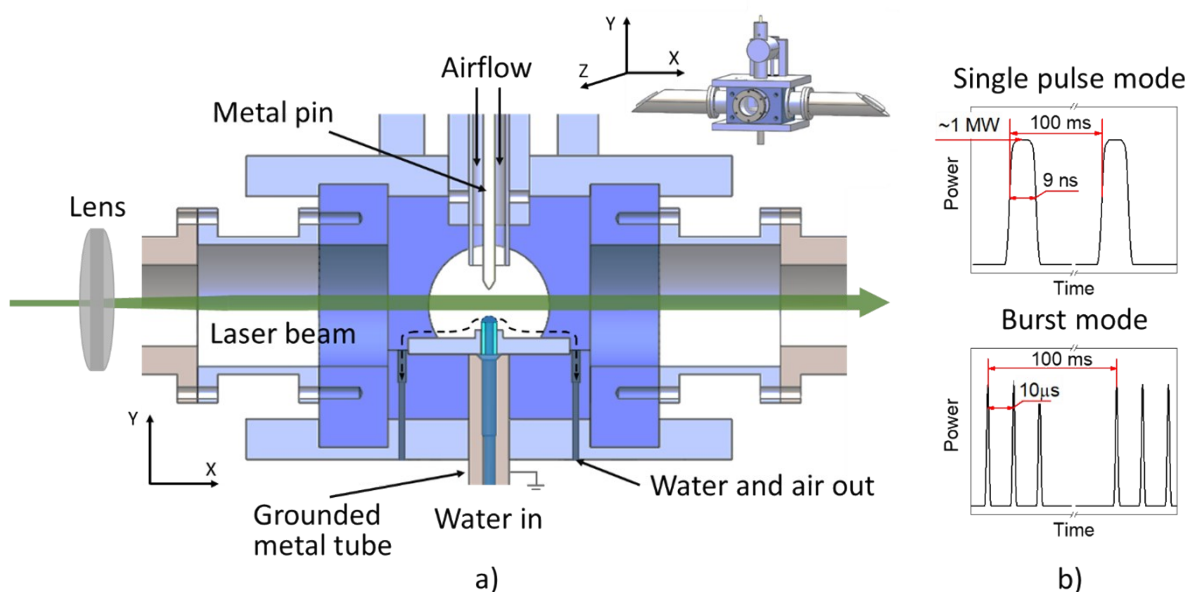

Fig. S1. Schematic view of the experimental setup (a) and visual explanation of the investigated frequency modes (b).

The voltage and current waveforms were measured using a Tektronix P6015A high voltage probe (75 MHz bandwidth, 4.7 ns rise time) and current measurement shunt (CS-10/500, Megaimpulse, 1 ns rise time), respectively. The measured signals were recorded using an oscilloscope with a bandwidth of 600 MHz (LeCroy WaveRunner 64Xi). The phase shift between the voltage and current waveforms was measured connecting a non-inductive resistor as a load and was found to be 3.2 ns. Accordingly, the energy deposited into the main discharge pulse was estimated using the following equation:

$$E = \int_{t_0}^{t_1} (I \cdot U) dt \quad [J] \quad (1)$$

where  $t_0$  and  $t_1$  define the time interval of the first positive current pulse, and  $I$  and  $U$  are the current and the voltage, respectively.

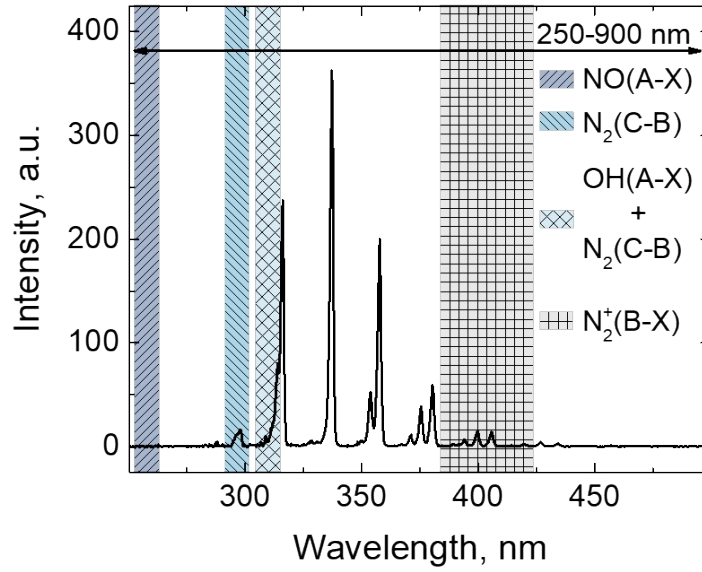

Fig. S2. Overview of the optical emission spectra with marked regions that correspond to the optical filters transparency.

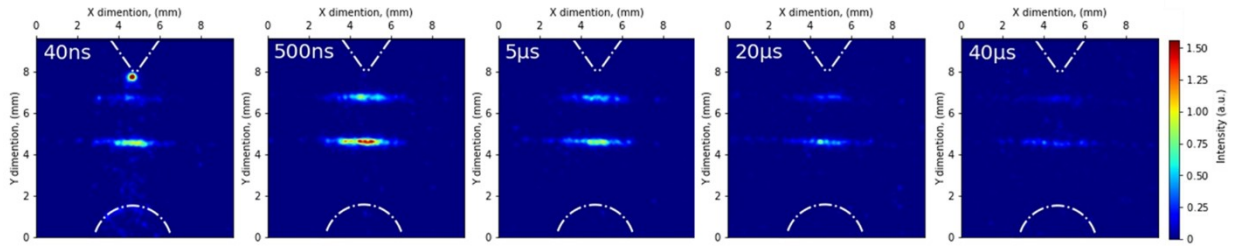

Fig. S3. Spatial resolved TALIF profiles of O atoms. The images are match cuts of TALIF measurements at two positions in the discharge gap.

### O atoms kinetics:

Phase I, shown in Fig 3a, represents the time range when O atoms generation was dominant. Aside from  $O_2$  dissociation by electron impact reaction, a major contribution into O atoms formation is a set of reactions with electronically excited  $N_2(B^3\Pi_g, C^3\Pi_u)$  states:<sup>1</sup>

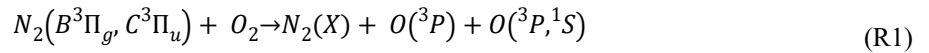

It is noteworthy that at atmospheric pressure, high electronically excited  $N_2(B^3\Pi_g, C^3\Pi_u)$  states have the lifetime of  $\tau < 5$  ns, while  $N_2(A^3\Sigma_u^+)$  state has the  $\tau \approx 60$  ns.<sup>2</sup> O atoms' prolonged growth during 100's of ns is explained by periodically appearing corona discharge (see Fig. S3) that can effectively generate  $N_2(A^3\Sigma_u^+)$  and, consequently, form O atoms as follows:<sup>3</sup>

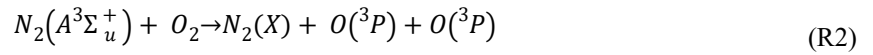

Interestingly, despite  $N_2(a^1\Sigma_u^-)$  can also be generated in the discharge; these states are effectively quenched by  $H_2O$  and therefore were not considered as a possible route of O atoms formation.<sup>4</sup>

Time-resolved ICCD images shown in Fig. 4S demonstrate that the pulsed corona is generated nearby the pin electrode. Moreover, with increasing applied voltage, this effect becomes more pronounced. It defines a nonlinear increase in the O atoms' density of 2.8 times, increasing the pulse energy by 1.5 times, as shown in Fig 3a.

The main recombination pathway of the O atoms is the  $O_3$  generation in three-body reactions during phase II.

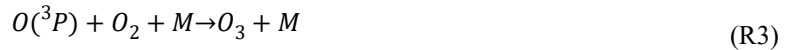

The measurements show that the detected TALIF signal has a long tail up to  $\sim 50$  ms (Fig. 3a, dashed lines with empty dots). This is attributed to artificial  $O(^3P)$  atoms generation because of laser-induced photodissociation of

O<sub>3</sub> and well correlated with the gas phase removal by the coming air. The same artifact was observed by Oda et al., and the correction has been made to the overall O number density accordingly to the proposed methodology.<sup>5</sup>

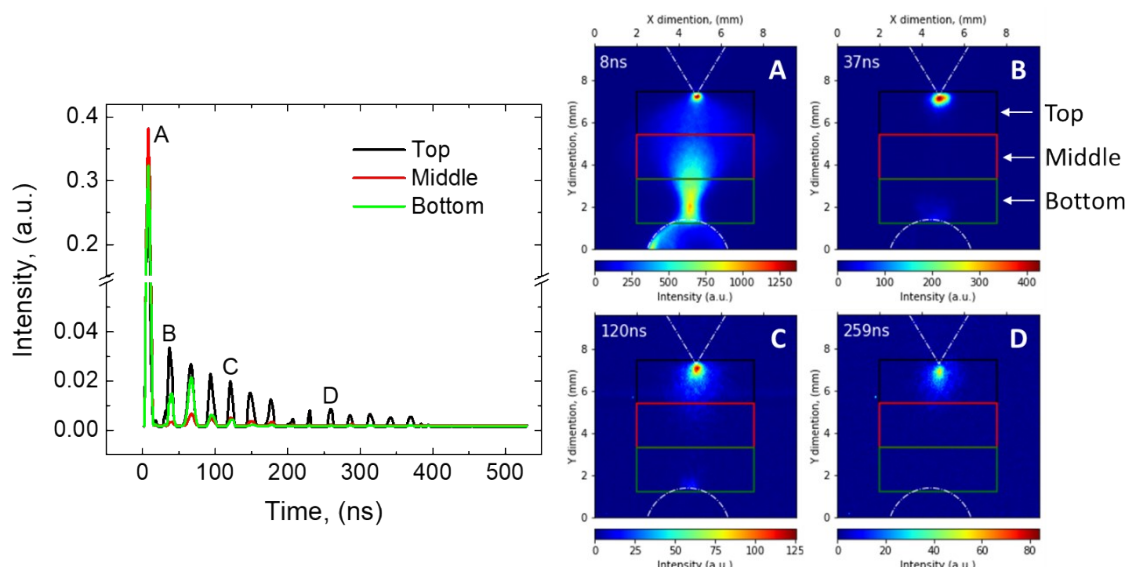

Fig. S4. Time-resolved emission intensity of the NRP discharge at 3 positions in the gap for the pulse energy of 3.4 mJ. The first intense peak (image A) represents the main pulse; the following peaks (images B-D) depict periodically appearing pulsed corona. The images were made with an exposure time of 5 ns.

Table S1. A set of reactions responsible for O atoms, OH, and NO radicals generation and loss and their characteristic times estimated using experimentally obtained number densities for the pulse energy of 3.4 mJ.

|                    | Reaction                                                              | $k(298K), m^3s^{-1}$          | $\tau^a$                 | Ref. |
|--------------------|-----------------------------------------------------------------------|-------------------------------|--------------------------|------|
| <b>O atoms</b>     |                                                                       |                               |                          |      |
| (R1)               | $N_2(B^3\Pi_g, C^3\Pi_u) + O_2 \rightarrow N_2(X) + O(P) + O(P, ^1S)$ | $3 \times 10^{-16}$           | $\sim 6.5$ ns            | 4    |
| (R2)               | $N_2(A^3\Sigma_u^+) + O_2 \rightarrow N_2(X) + O(P) + O(P)$           | $1.7 \times 10^{-18}$         | $\sim 114$ ns            | 4    |
| (R3)               | $O(^3P) + O_2 + N_2 \rightarrow O_3 + N_2$                            | $1.89 \times 10^{-45b}$       | $\sim 124$ $\mu s$       | 4    |
|                    | $O(^3P) + O_2 + O_2 \rightarrow O_3 + O_2$                            | $1.71 \times 10^{-45b}$       | $\sim 509$ $\mu s$       | 4    |
| <b>OH radicals</b> |                                                                       |                               |                          |      |
| (R4)               | $N_2(a'^1\Sigma_u^-) + H_2O \rightarrow N_2(X) + H + OH$              | $3.00 \times 10^{-16}$        | -                        | 4    |
| (R5)               | $O(^1D) + H_2O \rightarrow OH + OH$                                   | $2.20 \times 10^{-16}$        | -                        | 6    |
| (R6)               | $N(^4S) + OH \rightarrow NO + H$                                      | $5.06 \times 10^{-17}$        | $\sim 25$ $\mu s$        | 6    |
| (R7)               | $OH + OH \rightarrow H_2O_2$                                          | $2.1 \pm 0.5 \times 10^{-17}$ | $\sim 59 \pm 12$ $\mu s$ | 6    |
| (R8)               | $OH + NO + N_2 \rightarrow HNO_2 + N_2$                               | $7.46 \times 10^{-43b}$       | $\sim 64$ $\mu s$        | 6    |
|                    | $OH + NO + O_2 \rightarrow HNO_2 + O_2$                               | $7.46 \times 10^{-43b}$       | $\sim 234$ $\mu s$       | 6    |
| (R9)               | $OH + OH + N_2 \rightarrow H_2O_2 + N_2$                              | $6.92 \times 10^{-43b}$       | $\sim 95$ $\mu s$        | 6    |
|                    | $OH + OH + O_2 \rightarrow H_2O_2 + O_2$                              | $6.92 \times 10^{-43b}$       | $\sim 347$ $\mu s$       | 6    |
| <b>NO radicals</b> |                                                                       |                               |                          |      |
| (R10)              | $N_2(A^3\Sigma_u^+) + O(P) \rightarrow NO + N(^2D)$                   | $7.00 \times 10^{-18}$        | $\sim 643$ ns            | 4    |
| (R11)              | $N(^4S) + NO \rightarrow N_2 + O(P)$                                  | $2.7 \pm 0.6 \times 10^{-17}$ | $\sim 35 \pm 8$ $\mu s$  | 6    |
| (R12)              | $O_3 + NO \rightarrow NO_2 + O_2$                                     | $1.9 \pm 0.3 \times 10^{-20}$ | $\sim 49 \pm 8$ ms       | 6    |

<sup>a</sup>The characteristic time ( $\tau$ ) was estimated as  $\tau = (k \times n)^{-1}$ , where  $k$  is a reaction rate constant, and  $n$  is a number density of the involved species obtained in this work (O atoms, OH, and NO radicals) or theoretically estimated ( $N_2$ ,  $O_2$ ) based on the ideal gas law. <sup>b</sup>Three body reactions with reaction rate in  $m^6 s^{-1}$ .

## REFERENCES

- <sup>1</sup> D.L. Rusterholts, D.A. Lacoste, G.D. Stancu, D.Z. Pai, and C.O. Laux, J. Phys. D. Appl. Phys. **46**, 21pp (2013).
- <sup>2</sup> G.D. Stancu, F. Kaddouri, D.A. Lacoste, and C.O. Laux, J. Phys. D. Appl. Phys. **43**, 4002 (2010).
- <sup>3</sup> R. Ono, C. Tobaru, Y. Teramoto, and T. Oda, Plasma Sources Sci. Technol. **18**, 8 (2009).
- <sup>4</sup> A. Komuro, R. Ono, and T. Oda, J. Phys. D. Appl. Phys. **46**, 175206 (13pp) (2013).
- <sup>5</sup> R. Ono, K. Takezawa, and T. Oda, J. Appl. Phys. **106**, (2009).
- <sup>6</sup> J.A. Manion, R.E. Huie, R.D. Levin, D.R. Burgess Jr, V.L. Orkin, W. Tsang, W.S. McGivern, J.W. Hudgens, V.D. Knyazev, and D.B. Atkinson, URL [Http//Kinetics. Nist. Gov](http://Kinetics.Nist.Gov) (Access Date 16.12.2021) (2015).
